# Supplementary material for: Gender and Race-Based Health Disparities in COVID-19 Outcomes among Hospitalized Patients in the United States: A Retrospective Analysis of a National Sample
Source: MDPI journal article supplement (doi:10.3390/vaccines10122036), 2022-11-29
Supplement: s1 [file s1]

| <b>Supplementary Table S1: ICD 10 codes</b>                     |                                                                                                |
|-----------------------------------------------------------------|------------------------------------------------------------------------------------------------|
| <b>Variable</b>                                                 | <b>ICD-10 CM code</b>                                                                          |
| STEMI                                                           | I21.0X, I21.1X, I21.2X, I21.3X, I21.9X                                                         |
| Covid                                                           | U071, U00, U49, U50, U85, J1282                                                                |
| Cardiac arrest                                                  | I46.XX, I49.0XX, I97.12XX, I97.71XX                                                            |
| Smoking                                                         | F17.XX, Z87.891                                                                                |
| CAD                                                             | I25.10, I25.11, I25.118, I25.119, I252, I253, I25.4XX, I25.5, I25.6, I25.8XX, I25.7XX, I25.9XX |
| CHF, HTN, DM, Renal failure, Chronic pulmonary disease, Obesity | Elixhauser comorbidities were used                                                             |
| AKI                                                             | N17.XX, N99.0                                                                                  |
| Stroke                                                          | I63.XX, I60.XX, I61.XX, G43.6XX, I97.82XX, I97.81XX                                            |
| <b>Variable</b>                                                 | <b>ICD-10 procedure code</b>                                                                   |
| Intubation                                                      | 5A1945Z, 5A1955Z, 5A1935Z, 5A09357, 5A09457, 5A09557                                           |
| Vasopressor use                                                 | 3E030XZ, 3E033XZ, 3E040XZ, 3E043XZ, 3E050XZ, 3E053XZ, 3E060XZ, 3E063XZ                         |
| Hemodialysis                                                    | 5A1D70Z, 5A1D90Z, 5A1D80Z, 5A1D00Z, 5A1D60Z                                                    |

**Supplemental Table S2. aOR for mortality when compared to White males.**

|                               | <b>aOR</b> | <b>95% CI (LL-UL)</b> | <b>P value</b> |
|-------------------------------|------------|-----------------------|----------------|
| White female                  | 0.69       | 0.67–0.72             | <0.001         |
| Black male                    | 0.96       | 0.92–1.01             | 0.17           |
| Black female                  | 0.68       | 0.64–0.71             | <0.001         |
| Hispanic male                 | 1.40       | 1.33–1.47             | <0.001         |
| Hispanic female               | 0.88       | 0.83–0.93             | <0.001         |
| Asian/Pacific islander male   | 1.27       | 1.16–1.38             | <0.001         |
| Asian/Pacific islander female | 0.84       | 0.76–0.93             | <0.001         |
| Native male                   | 1.98       | 1.67–2.35             | <0.001         |
| Native female                 | 1.37       | 1.14–1.66             | <0.001         |
| Other male                    | 1.28       | 1.18–1.38             | <0.001         |
| Other female                  | 0.92       | 0.84–1.02             | 0.12           |

**Supplemental Table S3. aOR for intubation when compared to White male.**

|                               | <b>aOR</b> | <b>95% CI (LL-UL)</b> | <b>P value</b> |
|-------------------------------|------------|-----------------------|----------------|
| White female                  | 0.65       | 0.63–0.67             | <0.001         |
| Black male                    | 0.94       | 0.90–0.98             | 0.007          |
| Black female                  | 0.71       | 0.68–0.74             | <0.001         |
| Hispanic male                 | 1.46       | 1.39–1.53             | <0.001         |
| Hispanic female               | 0.85       | 0.81–0.90             | <0.001         |
| Asian/Pacific islander male   | 1.49       | 1.38–1.61             | <0.001         |
| Asian/Pacific islander female | 0.90       | 0.82–0.999            | 0.04           |

|               |      |            |        |
|---------------|------|------------|--------|
| Native male   | 1.78 | 1.53–2.06  | <0.001 |
| Native female | 1.18 | 1.01–1.37  | 0.03   |
| Other male    | 1.43 | 1.33–1.53  | <0.001 |
| Other female  | 0.90 | 0.82–0.988 | 0.02   |

**Supplemental Table S4. aOR for vasopressor use when compared to White male.**

|                               | <b>aOR</b> | <b>95% CI (LL-UL)</b> | <b>P value</b> |
|-------------------------------|------------|-----------------------|----------------|
| White female                  | 0.67       | 0.62–0.71             | <0.001         |
| Black male                    | 1.05       | 0.93–1.17             | 0.38           |
| Black female                  | 0.86       | 0.76–0.97             | 0.01           |
| Hispanic male                 | 1.67       | 1.47–1.88             | <0.001         |
| Hispanic female               | 1.01       | 0.89–1.15             | 0.78           |
| Asian/Pacific islander male   | 1.72       | 1.44–2.06             | <0.001         |
| Asian/Pacific islander female | 1.16       | 0.96–1.41             | 0.11           |
| Native male                   | 1.33       | 0.83–2.12             | 0.22           |
| Native female                 | 0.84       | 0.46–1.54             | 0.58           |
| Other male                    | 1.46       | 1.23–1.73             | <0.001         |
| Other female                  | 1.08       | 0.87–1.35             | 0.43           |

**Supplemental Table S5. aOR for AKI with HD when compared to White male.**

|                               | <b>aOR</b> | <b>95% CI (LL-UL)</b> | <b>P value</b> |
|-------------------------------|------------|-----------------------|----------------|
| White female                  | 0.48       | 0.44–0.52             | <0.001         |
| Black male                    | 1.87       | 1.72–2.05             | <0.001         |
| Black female                  | 1.13       | 1.03–2.13             | <0.001         |
| Hispanic male                 | 1.93       | 1.76–2.13             | <0.001         |
| Hispanic female               | 0.97       | 0.86–1.08             | 0.61           |
| Asian/Pacific islander male   | 1.69       | 1.44–1.99             | <0.001         |
| Asian/Pacific islander female | 0.84       | 0.67–1.07             | 0.17           |
| Native male                   | 1.88       | 1.40–2.54             | <0.001         |
| Native female                 | 0.81       | 0.54–1.23             | 0.34           |
| Other male                    | 1.65       | 1.42–1.92             | <0.001         |
| Other female                  | 0.85       | 0.68–1.06             | 0.16           |

**Supplemental Table S6. aOR for AKI when compared to White male.**

|              | <b>aOR</b> | <b>95% CI (LL-UL)</b> | <b>P value</b> |
|--------------|------------|-----------------------|----------------|
| White female | 0.60       | 0.58–0.61             | <0.001         |
| Black male   | 1.92       | 1.86–2.00             | <0.001         |

|                               |      |           |        |
|-------------------------------|------|-----------|--------|
| Black female                  | 1.08 | 1.04–1.12 | <0.001 |
| Hispanic male                 | 1.10 | 1.06–1.14 | <0.001 |
| Hispanic female               | 0.62 | 0.59–0.65 | <0.001 |
| Asian/Pacific islander male   | 1.23 | 1.15–1.31 | <0.001 |
| Asian/Pacific islander female | 0.71 | 0.66–0.77 | <0.001 |
| Native male                   | 1.07 | 0.92–1.25 | 0.33   |
| Native female                 | 0.63 | 0.54–0.73 | <0.001 |
| Other male                    | 1.23 | 1.15–1.31 | <0.001 |
| Other female                  | 0.73 | 0.68–0.79 | <0.001 |

**Supplemental Table S7. aOR for cardiac arrest when compared to White male.**

|                               | <b>aOR</b> | <b>95% CI (LL-UL)</b> | <b>P value</b> |
|-------------------------------|------------|-----------------------|----------------|
| White female                  | 0.63       | 0.59–0.68             | <0.001         |
| Black male                    | 1.43       | 1.30–1.57             | <0.001         |
| Black female                  | 1.05       | 0.96–1.16             | 0.24           |
| Hispanic male                 | 1.82       | 1.65–2.01             | <0.001         |
| Hispanic female               | 1.18       | 1.06–1.33             | 0.003          |
| Asian/Pacific islander male   | 1.78       | 1.50–2.10             | <0.001         |
| Asian/Pacific islander female | 0.93       | 0.76–1.15             | 0.55           |
| Native male                   | 1.68       | 1.25–2.26             | 0.001          |
| Native female                 | 0.90       | 0.62–1.31             | 0.60           |
| Other male                    | 1.68       | 1.44–1.95             | <0.001         |
| Other female                  | 1.26       | 1.06–1.51             | 0.008          |

**Supplemental Table S8. aOR for stroke when compared to White male.**

|                               | <b>aOR</b> | <b>95% CI (LL-UL)</b> | <b>P value</b> |
|-------------------------------|------------|-----------------------|----------------|
| White female                  | 0.83       | 0.76–0.91             | <0.001         |
| Black male                    | 1.31       | 1.18–1.46             | <0.001         |
| Black female                  | 1.04       | 0.93–1.16             | 0.45           |
| Hispanic male                 | 1.24       | 1.11–1.39             | <0.001         |
| Hispanic female               | 0.92       | 0.81–1.05             | 0.26           |
| Asian/Pacific islander male   | 1.34       | 1.09–1.64             | 0.005          |
| Asian/Pacific islander female | 1.45       | 1.16–1.81             | 0.001          |
| Native male                   | 1.17       | 0.71–1.94             | 0.52           |
| Native female                 | 0.80       | 0.50–1.30             | 0.37           |
| Other male                    | 1.70       | 1.43–2.03             | <0.001         |
| Other female                  | 1.21       | 0.98–1.51             | 0.07           |
